# Supplementary material for: A sclerite-bearing stem group entoproct from the early Cambrian and its implications
Source: PubMed Central journal article supplement (PMC3548229; doi:10.1038/srep01066), 2013-01-17

## **SUPPLEMENTARY INFORMATION**

### **A sclerite-bearing stem group entoproct from the early Cambrian and its implications**

**Zhifei Zhang<sup>1,5\*</sup>, Lars E. Holmer<sup>2</sup>, Christian B. Skovsted<sup>3</sup>, Glenn A. Brock<sup>4</sup>, Graham E. Budd<sup>2</sup>, Dongjing Fu<sup>1</sup>, Xingliang Zhang<sup>1</sup>, Degan Shu<sup>1</sup>, Jian Han<sup>1</sup>, Gianni Liu<sup>1</sup>, Haizhou Wang<sup>2</sup>, Aodhan Butler<sup>2</sup> & Guoxiang LI<sup>5</sup>**

<sup>1</sup>Early Life Institute, State Key Laboratory of Continental Dynamics, Northwest University, Xi'an, 710069, China

<sup>2</sup>Uppsala University, Department of Earth Sciences, Palaeobiology, Villavägen 16, SE-752 36, Uppsala, Sweden

<sup>3</sup>Department of Palaeozoology, Swedish Museum of Natural History, Box 50007, SE-104 05, Stockholm, Sweden

<sup>4</sup>Department of Biological Sciences, Macquarie University, New South Wales 2109, Australia

<sup>5</sup>LPS, Nanjing Institute of Geology and Palaeontology, Chinese Academy of Sciences, Nanjing, 210008, China.

\* Correspondence should be addressed to [elizf@nwu.edu.cn](mailto:elizf@nwu.edu.cn) or [zhangelle@126.com](mailto:zhangelle@126.com)

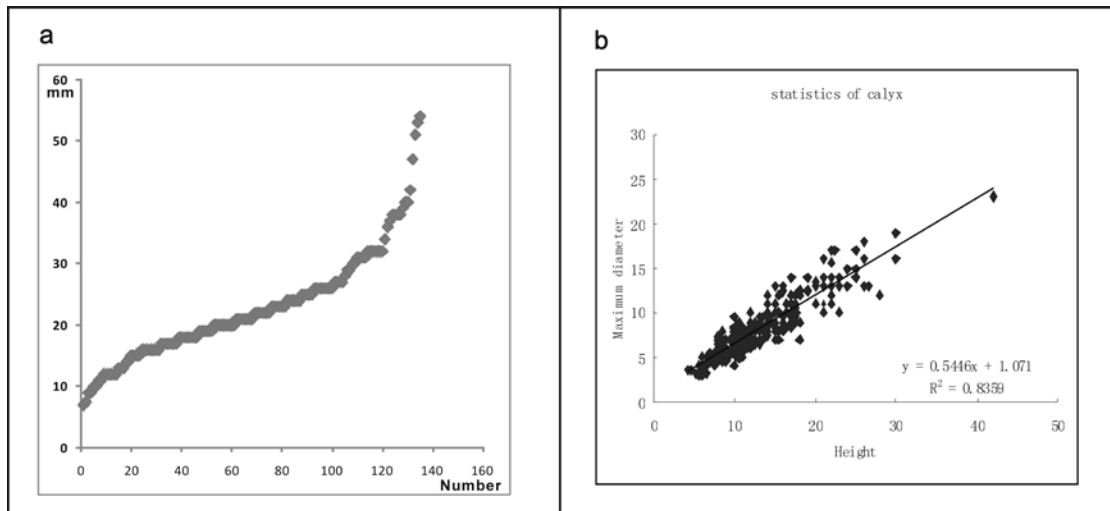

**Fig. S1.** Size statistics for the stem entoproct *Cotyledion tylodes* Luo et Hu 1999 from the Chengjiang fauna. **a**, body height variations of *Cotyledion*; **b**, plots of maximum height versus diameter of calyx in *Cotyledion* based on ELI collection from the early Cambrian Chengjiang fauna of China.

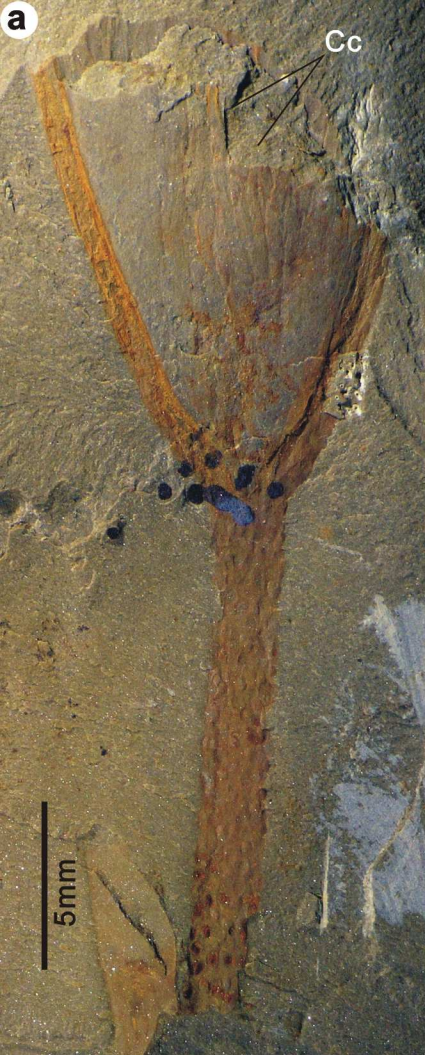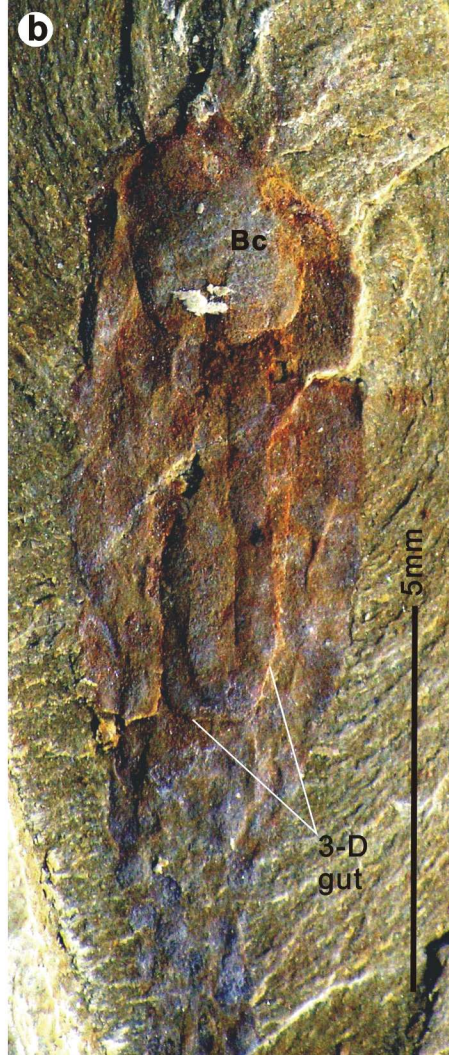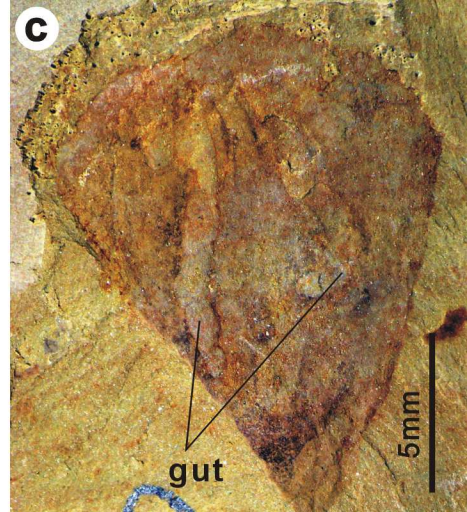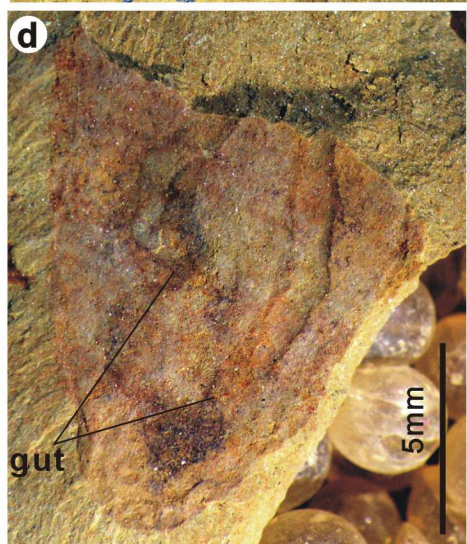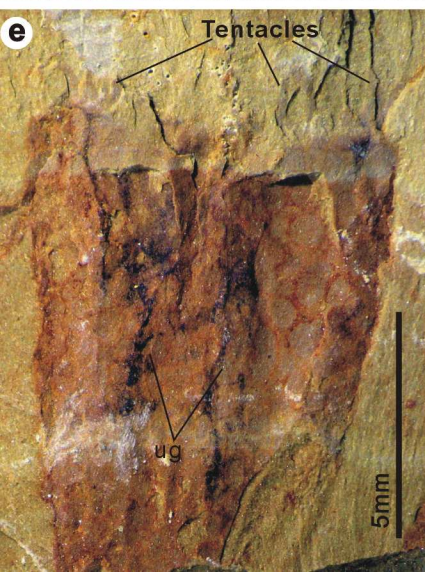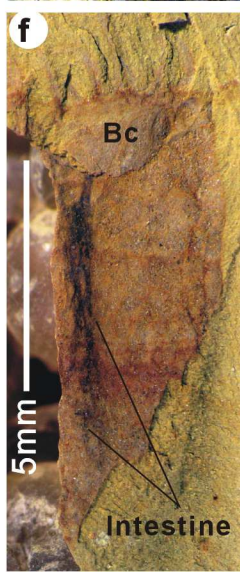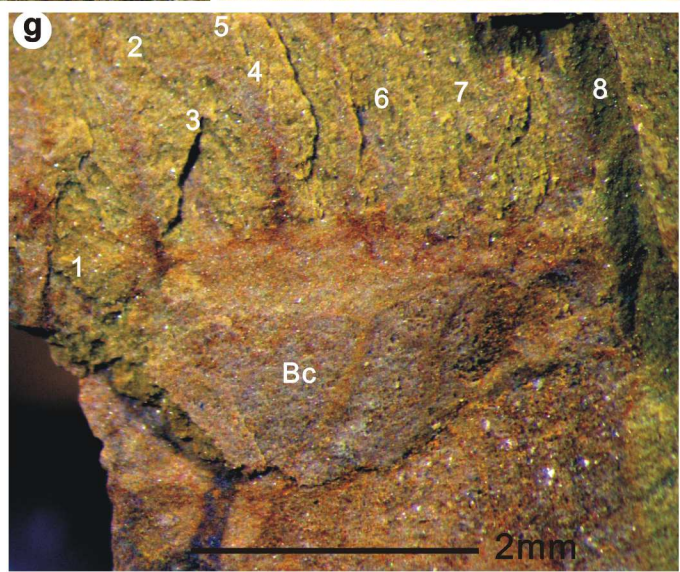

**Fig. S2.** The early Cambrian Chengjiang stem entoproct *Cotyledion tylodes* Luo et Hu 1999. **a**, ELI-C-0367B, Internal mould of mud-filled calyx cavity (Cc); **b**, ELI-C-0045A, an anterolaterally crushed specimen showing mud-infilled buccal cavity (Bc) and 3-D preserved gut; **c**, ELI-C-0346A, showing the mud-filled U-shaped digestive tract with pronounced relief; **d**, Counterpart of c; **e**, ELI-C-0312B, internal view of a calyx, showing the U-shaped impression of gut (ug) and basal impressions of sclerites on the internal wall of calyx; note the membrane band with tentacles; **f**, ELI-C-0296B, general view of a specimen squeezed in a mouth-anus direction; **g**, Details of the tentacles in f, note the mud-filled slit-like mouth (Bc).

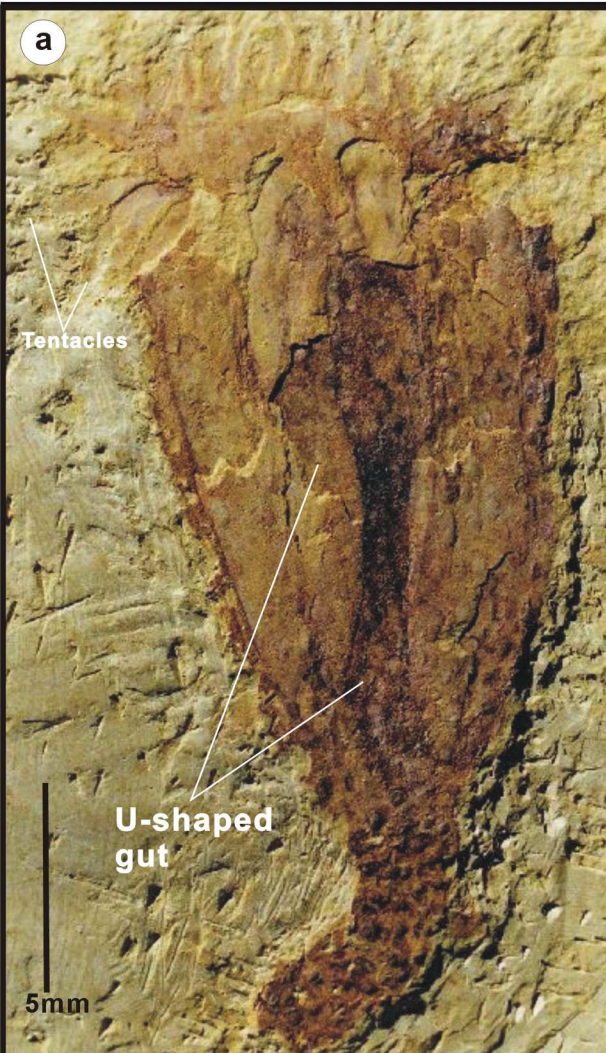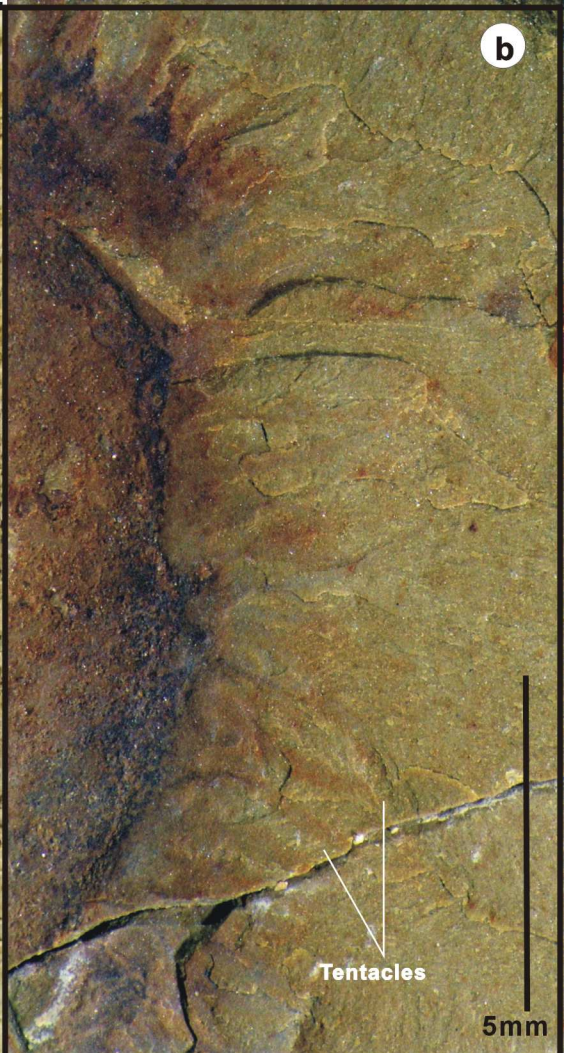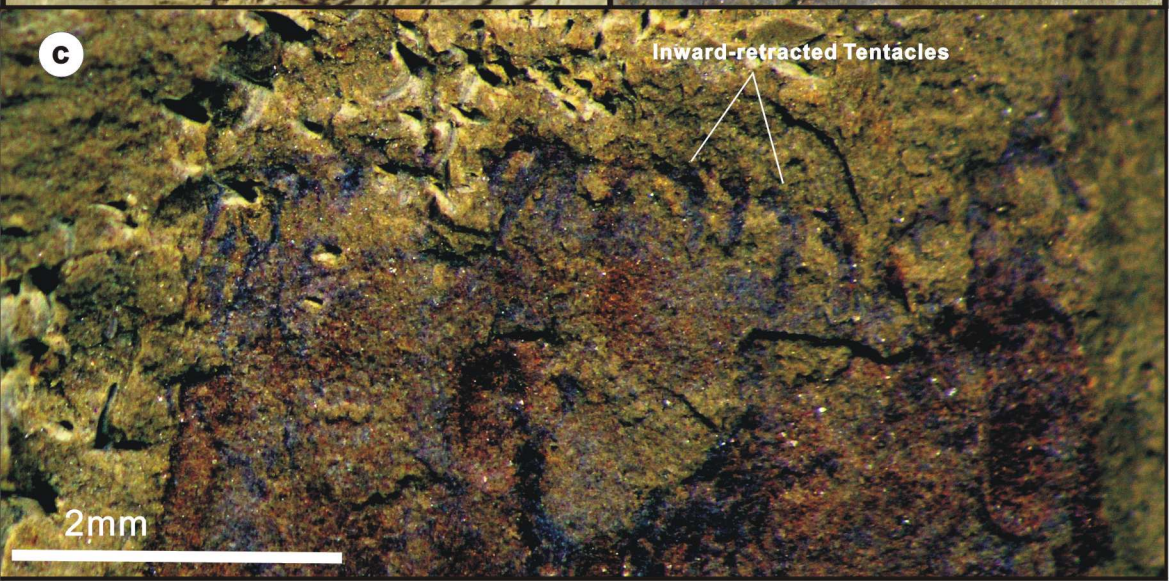

**Fig. S3.** Showing the tentacles of *Cotyledion* from the Chengjiang fauna. **a**, a anterior-laterally squeezed specimens with a circle of extended tentacles superbly preserved<sup>11</sup>; **b**, ELI-C 0375B, enlargement of the tentacles. **C**, ELI-C 0025A, close-up view of the inward-retracted and contracted tentacles.

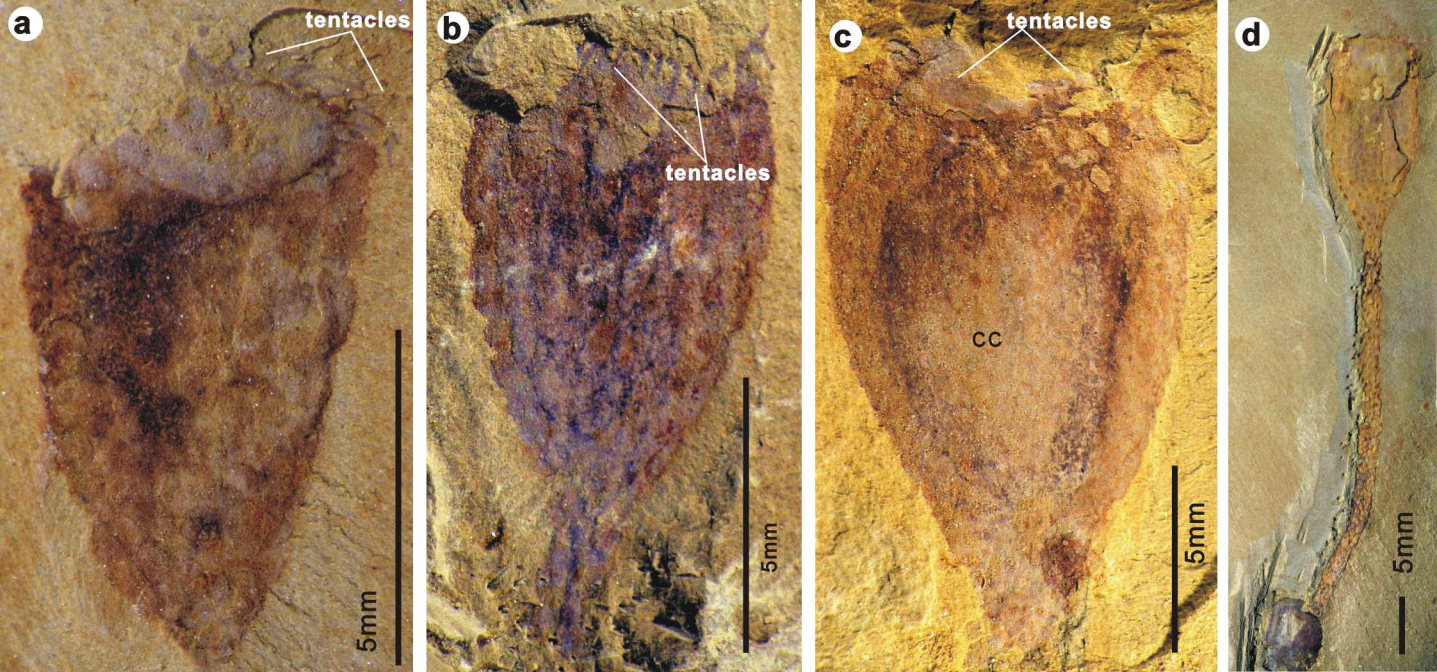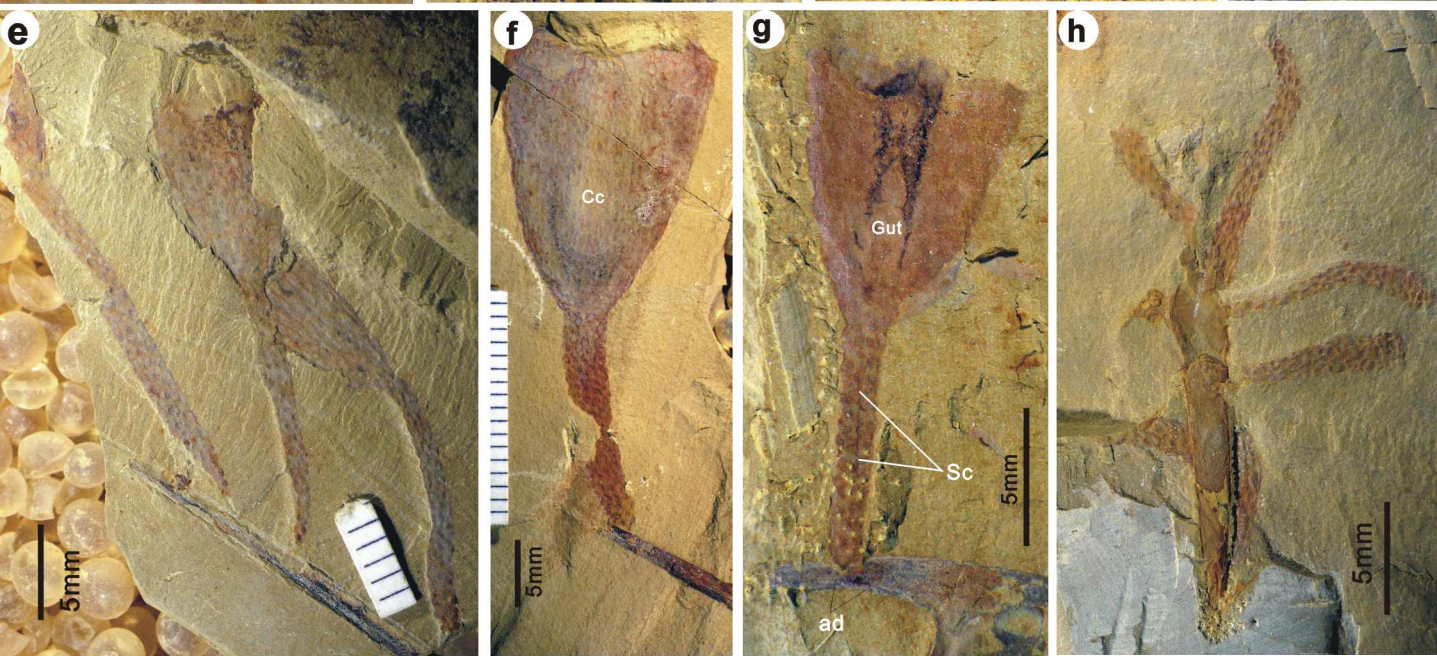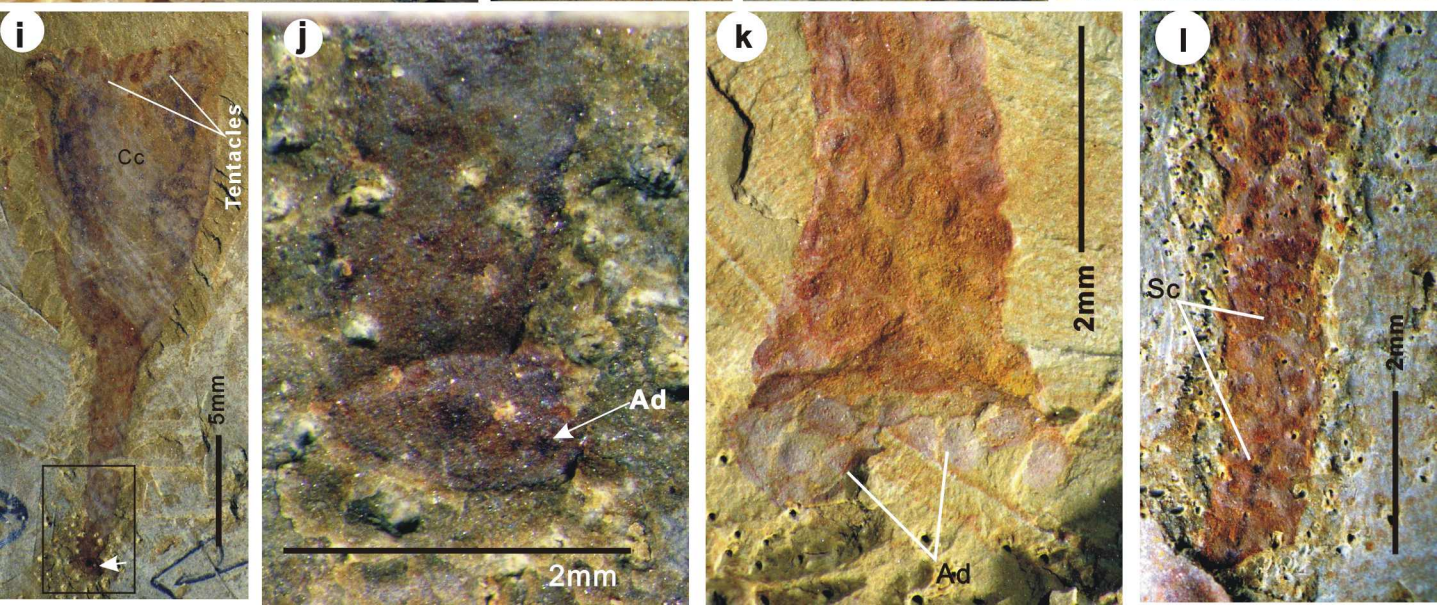

**Fig. S4.** Additional specimens of *Cotyledion tylodes* Luo & Hu 1999 from the Haikou and Erjie areas of Yunnan, China. **a**, ELI-C-0326, top view of the calyx with tentacles; **b**, **c**, ELI-C-0025A and 0034A, laterally compressed two specimens with contracted tentacle crown encircling retracted centrally pointing tentacles; **d**, ELI-C-0370, a specimen with long stalk attached to a trilobite, putatively crushed in mouth-anus direction; **e**, ELI-C-0346A, 3 individuals of *Cotyledion* commonly attached to a cheek of trilobite; **f**, ELI-C-0337A, a flattened specimen, showing the calyx cavity (Cc) and stalk attached to a trilobite spine; **g**, ELI-C-0194B, note the coelomic cavity of stalk (Sc); **h**, ELI-C-0346A, a gregarious population of *Cotyledion tylodes* attached by stalks in common to a single hyolith shell; **i**, ELI-C-0250A, a flattened impression of *Cotyledion*, noting the tentacles on the top calyx and knob-like holdfast at the end of the stalk. **j**, ELI-C-0250A, enlarged view of the knob-shaped attachment disc (Ad) in **i**. **k**, ELI-C-0333B, showing the distal attachment disc (Ad) of stalk; **l**, ELI-C-0352A, close-up view of the coelomic canal in the stalk.



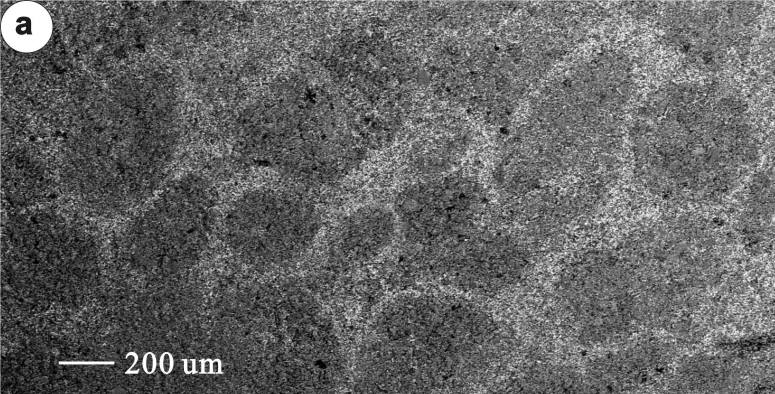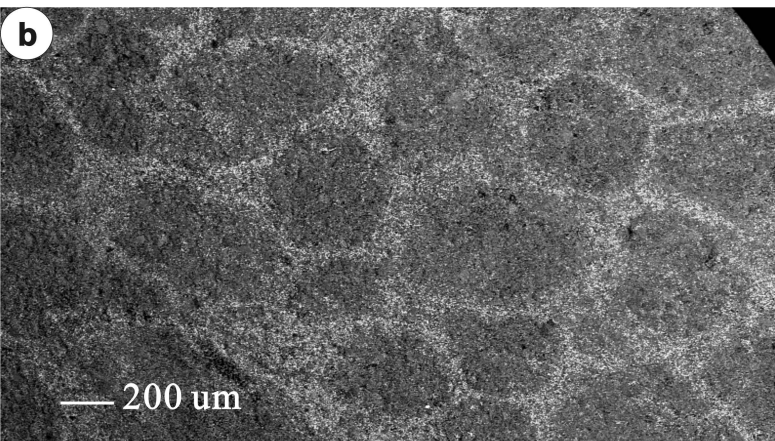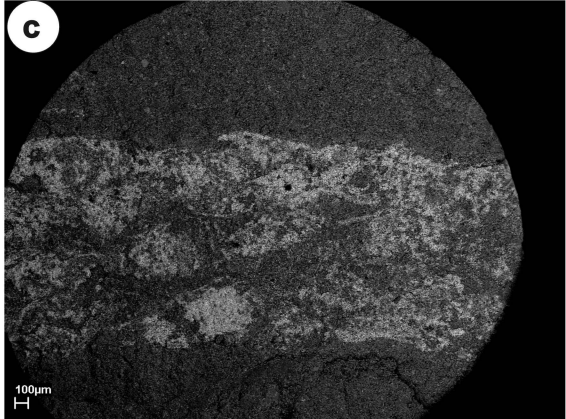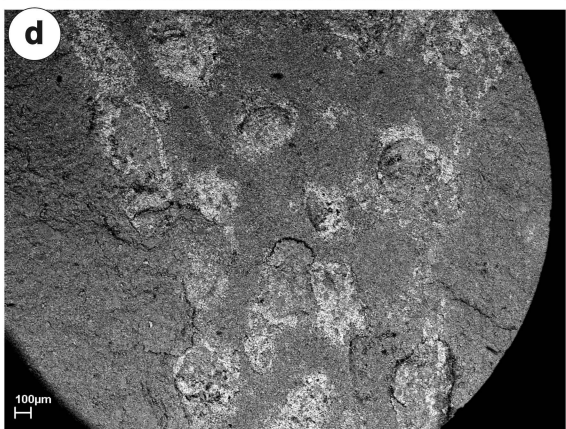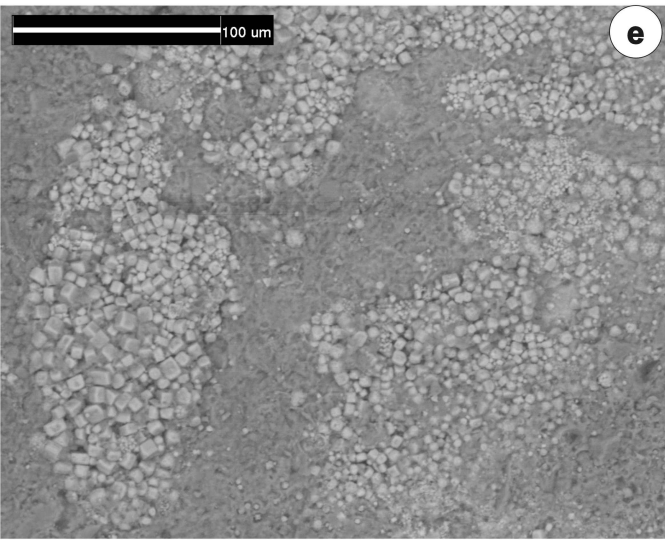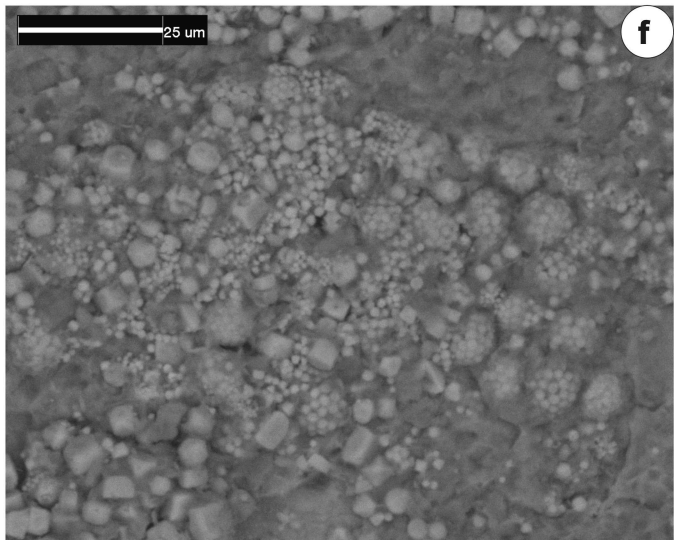

**Fig. S5.** BSEM examination of the sclerites of *Cotyledion* Luo et Hu 1999 from Chengjiang. **a**, ELI-C-0359A, interior mould of calyx, showing the pyrite preservation of sclerite impressions; **b**, BSEM of ELI-C-0359A; interior mould of calyx, showing calyx sclerite impressions netted together; **c**, ELI-C-0369, BSEM picture of stem sclerite impressions of *Cotyledion*; **d**, BSEM picture of transition section between the Calyx and stem of ELI-C-0370. **e** and **f**, Enlarged and detailed view of pseudomorphed framboidal pyrite on the sclerite of **d**.

**Table S1.** Statistics for *Cotyledion* based on ELI collection from the Chengjiang fauna, Yunnan, South China. All measurements are in mm. The following abbreviations are used: Lc, the height of calyx; Ls, the length of stalk; Wc, the diameter of calyx; Ws, the diameter of stalk. H, the body height of *Cotyledion* based on ELI collection.

|       | Lc   | Ls    | Wc   | Ws   | Lc/Wc | Lc/Ls | Ws/Wc | H    |
|-------|------|-------|------|------|-------|-------|-------|------|
| Count | 292  | 120   | 300  | 203  | 293   | 70    | 194   | 107  |
| Min   | 4.3  | 2.7   | 3    | 0.8  | 1.05  | 0.33  | 0.11  | 8    |
| Max   | 42   | 38    | 23   | 3    | 2.57  | 2.4   | 0.5   | 56   |
| Mean  | 13.3 | 15.44 | 8.32 | 1.65 | 1.61  | 0.78  | 0.23  | 26.4 |
| SD    | 5.55 | 6.47  | 3.2  | 0.39 | 0.26  | 0.33  | 0.06  | 0.23 |

**Table S2.** EDX analysis of the sclerites of *Cotyledion*, showing the high concentration of iron oxide with fewer amounts of phosphorus; note the moderate amount of aluminosilicates from the surrounding matrix.

| Elements | Weight(%) | Atom(%) |
|----------|-----------|---------|
| Mg K     | 1.15      | 1.25    |
| Al K     | 7.15      | 6.96    |
| Si K     | 9.19      | 8.59    |
| P K      | 0.88      | 0.74    |
| K K      | 1.16      | 0.78    |
| Fe K     | 43.01     | 20.22   |
| O        | 37.45     | 61.46   |
| Total    | 100.00    |         |

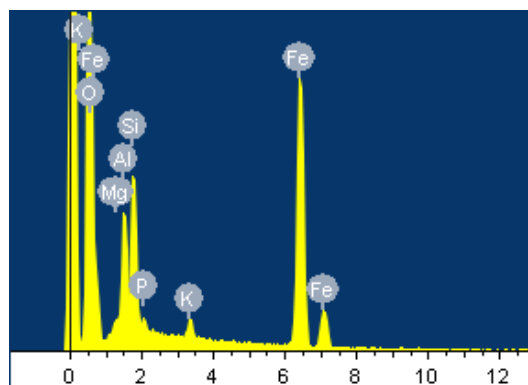

Supplement: srep01066-s1.pdf [file srep01066-s1.pdf]
